# Supplementary material
Source: publisher figshare collection journal article supplement (https://acs.figshare.com/ndownloader/files/28993863)
Supplement: Supplementary file 1 [file 28993863]

# A Robust, Multi-length Scale, Machine Learning Potential for Ag-Au Bimetallic Alloys from Clusters to Bulk Materials

Christopher M. Andolina<sup>1</sup>, Marta Bon<sup>2,†</sup>, Daniele Passerone<sup>2</sup> and Wissam A. Saidi<sup>1\*</sup>

<sup>1</sup> Department of Mechanical Engineering and Materials Science, University of Pittsburgh, Pittsburgh, PA 15216, USA

<sup>2</sup> Empa, Swiss Federal Laboratories for Materials Science and Technology, Electron Microscopy Center, Überlandstrasse 129, CH-8600 Dübendorf, Switzerland

<sup>†</sup> M.B. Current address, CRUK Beatson Research Institute, University of Scotland, Glasgow G61 1BD, United Kingdom

## Table of Contents

|                                                                                                                                     |   |
|-------------------------------------------------------------------------------------------------------------------------------------|---|
| <b>Bulk Crystal Lattice Constant and Atomic Energy.</b>                                                                             | 2 |
| <b>General Elastic Moduli Equations.</b>                                                                                            | 2 |
| <b>Point Defects.</b>                                                                                                               | 3 |
| <i>Vacancies.</i>                                                                                                                   | 3 |
| <i>Self Interstitials.</i>                                                                                                          | 3 |
| <i>Dumbbells.</i>                                                                                                                   | 3 |
| <i>Vacancy Mobility Energy.</i>                                                                                                     | 4 |
| Figure S1. Sample Energy barrier for vacancy migration (Evac, mig) via NEB DNP for (a) Ag and (b) Au. Lines added to guide the eye. | 4 |
| Table S1. Experimental and Computed Point Defect Energies for Ag and Au.                                                            | 4 |
| Table S2. Comparison of Ag and Au Clusters (Energy difference of 3D and 2D structures) energies.                                    | 5 |
| Table S3. Experimental, EAM, and DNP, DFT values other Ag and Au lattices.                                                          | 5 |
| <b>Surface Energies.</b>                                                                                                            | 6 |
| Table S4. Surface Energies $\gamma_s$ in mJ/m <sup>2</sup> for Ag slabs.                                                            | 6 |
| Table S5. Surface Energies $\gamma_s$ in mJ/m <sup>2</sup> for Au slabs.                                                            | 6 |
| <b>Planar Defects Energies.</b>                                                                                                     | 7 |
| Table S6. Ag Planar Defects surfaces energies in mJ/m <sup>2</sup> .                                                                | 7 |
| Table S7. Au Planar Defects surfaces energies in mJ/m <sup>2</sup> .                                                                | 7 |
| <b>Comparison of Potentials.</b>                                                                                                    | 8 |
| <b>Comparison of Core-Shell NP Growth via DNP and DFT.</b>                                                                          | 8 |
| Figure S2. Comparison of DNP and DFT showing the difference in energies during Au@Ag NP growth various timepoints.                  | 8 |
| References.                                                                                                                         | 9 |

**Bulk Crystal Lattice Constant and Atomic Energy.**

The lattice constant of the system and the cohesive energy ( $E_{\text{coh}}$ ) are determined from the optimized crystal structure. For elemental Ag and Au systems, we computed the cohesive energy per atom using equation 1,

$$E_{\text{coh}} = E_{\text{B}} - E_{\text{atom}} \quad (1)$$

where  $E_{\text{B}}$  is the bulk energy per atom and  $E_{\text{atom}}$  is the energy of the corresponding isolated atom. Thus, with this definition, a negative  $E_{\text{coh}}$  indicates that the system is thermodynamically stable.

**General Elastic Moduli Equations.**

In the DFT and the atomistic calculations, the elastic constants are calculated using strain-stress relationships by performing 12 distortions of the optimum lattice and then fully relaxing the atomic coordinates. The bulk moduli (e.g., bulk, shear, Young's moduli, and Poisson's ratios) are computed using the crystal lattice specific equations.<sup>1-3</sup>

$$K_{\text{H}} = \frac{K_{\text{V}} + K_{\text{R}}}{2}$$

$$G_{\text{H}} = \frac{G_{\text{V}} + G_{\text{R}}}{2}$$

$$E_{\text{H}} = \frac{9K_{\text{H}}G_{\text{H}}}{3K_{\text{H}} + G_{\text{H}}}$$

$$\nu = \frac{3K_{\text{H}} - 2G_{\text{H}}}{6K_{\text{H}} + 2G_{\text{H}}}$$

**Cubic systems**

$$K_{\text{V,G}} = \frac{C_{11} + 2C_{22}}{3}$$

$$G_{\text{V}} = \frac{3C_{44} + C_{11} - C_{12}}{5}$$

$$G_{\text{R}} = \frac{5C_{44}(C_{11} + C_{12})}{4C_{44} + 3(C_{11} - C_{12})}$$

### Point Defects.

Physical crystal structures are far from perfect or defect-free. Therefore, theoretical models need to reproduce defect formation energies and atomic structures accurately. We have investigated a selected group of point defects to evaluate the robustness of the Ag-Au DNP potential. Namely, we determined the energies of mono-vacancies,  $E_{\text{vac}}$ , along with their activation energies for diffusion. Also, we examined mono self- and dumbbell-interstitials. **Table S1** summarizes the formation energies. Overall, as seen from the table, DFT reproduces well the defects with low formation energies but somewhat overestimates those with higher formation energies, consistent with other systems such as Cu-Zr<sup>4</sup>. The DFT diffusion energy barrier  $E_{\text{vac,mig}}$  associated with the vacancy movement to an adjacent position within the lattice is in excellent agreement with the experimental value. DFT predicts that Ag has a smaller diffusion barrier than Au, consistent with the experiment (**Figure S1**). Also, as noted before in other fcc lattices<sup>4</sup>, the DFT energy of the Ag[100]<sub>db</sub> is found to be the lowest energy of the dumbbell series. Inspecting the results obtained using atomistic potentials, we see an excellent agreement between DNP and DFT with an absolute average difference between the values of 0.066, while both EAMs perform similarly and have an order of magnitude larger error.

#### *Vacancies.*

Vacancy defects are modeled by taking a bulk crystal model and randomly removing an atom. This model is then optimized, and the vacancy formation energy (Eq. **S2**)

$$E_{\text{vac}} = E - NE_{\text{B}} \quad (\text{S2})$$

Where  $E$  is the total energy of the optimized system with the defect, and  $N$  is the number of atoms and  $E_{\text{B}}$  the per-atom energy of the bulk. In the point defect calculations, we used superlattices with 2x2x2 unit cells.

#### *Self Interstitials.*

The interstitial formation energies  $E_f$  are computed similarly to the vacancy case. We examined interstitial defects located at unique symmetry points. For the octahedral (Oh) site, an adatom is inserted at the  $[\frac{1}{2}, \frac{1}{2}, \frac{1}{2}]$  position of the primitive unit cell. For a tetrahedral (Td) site, an atom is added to the  $[\frac{1}{4}, \frac{1}{4}, \frac{1}{4}]$  position.

#### *Dumbbells.*

Dumbbell defects (also known as split defects) were created by removing an atom and replacing it with a pair of atoms placed such that the midway point between them sits at the old location of the atom. Depending on orientation, atoms were placed such that they were equidistant between the nearest neighbor (or interstitial site) along the dumbbell axis and the other dumbbell atom. For these fcc metals, three types of dumbbells were modeled with their axis parallel to the [100], [110], or [111] direction. We have verified that dumbbell defects retain their original orientation by visual inspection of the final structures after optimization.

### Vacancy Mobility Energy.

The vacancy mobility energy was determined using the nudged elastic band method (NEB) calculations<sup>5</sup> utilizing LAMMPS<sup>6</sup> software. The vacancy path was mapped using 16 frames.

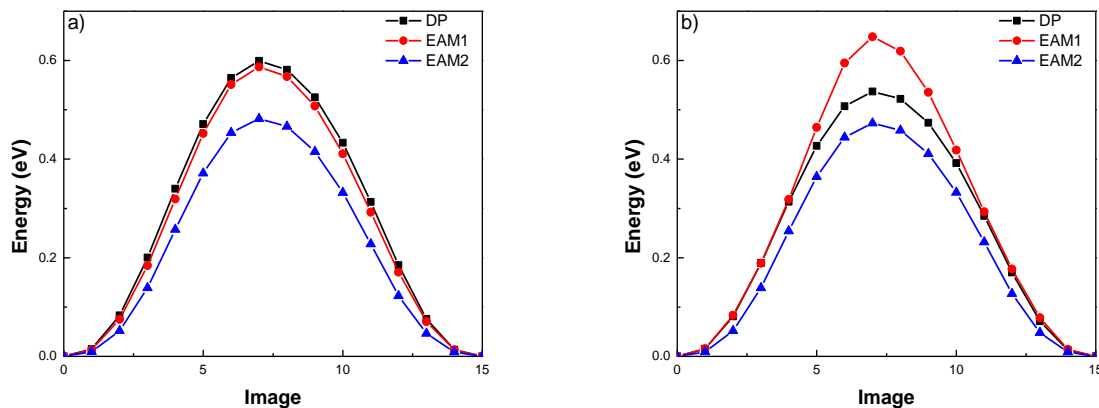

**Figure S1.** Sample Energy barrier for vacancy migration ( $E_{\text{vac, mig}}$ ) via NEB DNP for (a) Ag and (b) Au. Lines added to guide the eye.

**Table S1.** Experimental and Computed Point Defect Energies for Ag and Au.

| Point Defect Energy (eV)              | EXP                | DNP   | EAM1 <sup>7</sup> | EAM2 <sup>8</sup> | DFT  |
|---------------------------------------|--------------------|-------|-------------------|-------------------|------|
| Ag $E_{\text{vac}}$                   | 1.1 <sup>64</sup>  | 0.779 | 1.110             | 1.100             | 1.03 |
| Ag $E_{\text{vac, mig}}$              | 0.66 <sup>64</sup> | 0.599 | 0.587             | 0.482             |      |
| Ag $E_{\text{f}}$ (Oh)                |                    | 2.373 | 3.260             | 3.030             | 2.38 |
| Ag $E_{\text{f}}$ (Td)                |                    | 3.456 | 3.810             | 3.530             | 3.89 |
| Ag $E_{\text{f}}$ [100] <sub>db</sub> |                    | 2.493 | 3.260             | 2.950             | 2.32 |
| Ag $E_{\text{f}}$ [110] <sub>db</sub> |                    | 3.640 | 3.500             | 3.230             | 3.31 |
| Ag $E_{\text{f}}$ [111] <sub>db</sub> |                    | 3.415 | 3.750             | 3.540             | 3.47 |
| Au $E_{\text{vac}}$                   | 1.0 <sup>64</sup>  | 0.594 | 1.030             | 0.990             | 0.36 |
| Au $E_{\text{vac, mig}}$              | 0.88 <sup>65</sup> | 0.537 | 0.648             | 0.473             |      |
| Au $E_{\text{f}}$ (Oh)                |                    | 2.323 | 2.610             | 2.830             | 2.34 |
| Au $E_{\text{f}}$ (Td)                |                    | 3.889 | 2.710             | 3.120             | 4.74 |
| Au $E_{\text{f}}$ [100] <sub>db</sub> |                    | 2.618 | 2.470             | 2.730             | 3.78 |
| Au $E_{\text{f}}$ [110] <sub>db</sub> |                    | 2.285 | 2.580             | 2.900             | 2.36 |
| Au $E_{\text{f}}$ [111] <sub>db</sub> |                    | 3.828 | 2.670             | 3.070             | 3.96 |

All energies are in eV. All DFT values in this table are calculated for this work.

**Table S2.** Comparison of Ag and Au Clusters 3D *versus* 2D structures ( $\Delta$ Energy, eV)

| Cluster         | DNP   | EAM1 <sup>7</sup> | EAM2 <sup>8</sup> | DFT   |
|-----------------|-------|-------------------|-------------------|-------|
| Ag <sub>6</sub> | 0.18  | 0.00              | 0.00              | 0.24  |
| Ag <sub>7</sub> | -0.04 | 0.40              | 0.00              | -0.39 |
| Ag <sub>8</sub> | -0.04 | 0.08              | 0.48              | -0.58 |
| Ag <sub>9</sub> | -0.05 | -0.32             | 0.17              | -0.44 |
| Au <sub>6</sub> | 0.809 | 1.289             | 0.000             | 0.97  |
| Au <sub>7</sub> | 0.918 | 0.411             | 0.171             | 0.70  |
| Au <sub>8</sub> | 1.197 | 0.603             | 0.000             | 0.67  |
| Au <sub>9</sub> | 0.852 | -0.619            | -0.652            | 0.63  |

All DFT values in this table are calculated for this work.

**Table S3.** EAM, and DNP, DFT values other Ag and Au lattices.

| Properties                | DNP    | EAM1 <sup>7</sup> | EAM2 <sup>8</sup> | DFT    |
|---------------------------|--------|-------------------|-------------------|--------|
| Ag hcp a                  | 2.93   | 2.87              | 2.89              | 2.95   |
| Ag hcp c                  | 4.81   | 4.71              | 4.75              | 4.79   |
| Ag hcp E <sub>0</sub>     | -2.69  | -2.85             | -2.85             | -2.83  |
| Ag V <sub>0</sub>         | 17.83  | 16.78             | 17.22             | 16.08  |
| Ag bcc (Å)                | 3.30   | 3.23              | 5.94              | 3.30   |
| Ag bcc E <sub>0</sub>     | -2.69  | -2.81             | -1.85             | -2.75  |
| Ag V <sub>0</sub>         | 17.99  | 16.92             | 26.22             | 17.97  |
| Ag diamond                | 6.21   | 6.08              | 3.28              | 6.71   |
| Ag diamond E <sub>0</sub> | -1.97  | -1.91             | -2.82             | -2.33  |
| Ag diamond V <sub>0</sub> | 29.98  | 28.12             | 17.67             | 29.36  |
| Ag sc                     | 2.76   | 2.69              | 2.70              | 2.70   |
| Ag sc E <sub>0</sub>      | -2.37  | -2.42             | -2.45             | -2.01  |
| Ag V <sub>0</sub>         | 20.963 | 19.56             | 19.68             | 19.68  |
| Au hcp a                  | 2.935  | 2.867             | 2.882             | 2.910  |
| Au hcp c                  | 5.000  | 4.712             | 4.736             | 4.889  |
| Au hcp E <sub>0</sub>     | -3.180 | -3.920            | -3.929            | -3.350 |
| Au V <sub>0</sub>         | 22.011 | 16.774            | 17.032            | 20.699 |
| Au bcc                    | 3.312  | 3.240             | 3.256             | 3.130  |
| Au bcc E <sub>0</sub>     | -3.180 | -3.874            | -3.900            | -3.190 |
| Au V <sub>0</sub>         | 14.905 | 17.014            | 17.255            | 18.132 |
| Au diamond                | 6.201  | 5.951             | 5.797             | 6.381  |
| Au diamond E <sub>0</sub> | -2.642 | -3.042            | -2.935            | -2.469 |
| Au V <sub>0</sub>         | 27.904 | 26.347            | 24.350            | 25.984 |
| Au sc                     | 2.751  | 2.688             | 2.678             | 2.750  |
| Au sc E <sub>0</sub>      | -2.954 | -3.464            | -3.579            | -2.634 |
| Au V <sub>0</sub>         | 20.829 | 19.420            | 19.208            | 20.797 |

All DFT calculations from this work. hcp (a and c), bcc, diamond, and sc lattice constants in Å, E<sub>0</sub> in eV/atom, and V<sub>0</sub> in Å<sup>3</sup>.

**Surface Energies.**

The surface formation energy  $\gamma_s$  is computed using equation 3.

$$\gamma_s = (E_{\text{slab}} - NE_B)/(2A) \quad (\text{S3})$$

Here  $E_{\text{slab}}$  is the energy of the slab model and  $A$  is the surface area perpendicular to the slab direction, and  $N$  is the number of atoms in the slab. The factor of 2 is included to account for the two surfaces in the slab models.

**Table S4.** Surface Energies  $\gamma_s$  in mJ/m<sup>2</sup> for Ag slabs.

| Surface Termination | $\gamma_s$ Ag |                   |                   |                  |
|---------------------|---------------|-------------------|-------------------|------------------|
|                     | DNP           | EAM1 <sup>7</sup> | EAM2 <sup>8</sup> | DFT <sup>9</sup> |
| 100                 | 821           | 702               | 977               | 820              |
| 110                 | 871           | 764               | 1084              | 870              |
| 111                 | 695           | 617               | 905               | 760              |
| 210                 | 940           | 1157              | 1143              | 900              |
| 211                 | 843           | 1105              | 1061              | 879              |
| 221                 | 829           | 1084              | 1043              | 820              |
| 310                 | 925           | 1161              | 1125              | 890              |
| 311                 | 877           | 1129              | 1094              | 860              |
| 320                 | 931           | 1165              | 1141              | 890              |
| 321                 | 880           | 1142              | 1111              | 860              |
| 322                 | 809           | 1057              | 1015              | 770              |
| 331                 | 857           | 1117              | 1077              | 850              |
| 332                 | 801           | 1035              | 1002              | 790              |

All DFT values are taken from the MPDB.

**Table S5.** Surface Energies  $\gamma_s$  in mJ/m<sup>2</sup> for Au slabs.

| Surface Termination | $\gamma_s$ Au |                   |                   |                  |
|---------------------|---------------|-------------------|-------------------|------------------|
|                     | DNP           | EAM1 <sup>7</sup> | EAM2 <sup>8</sup> | DFT <sup>9</sup> |
| 100                 | 821           | 702               | 977               | 820              |
| 110                 | 871           | 764               | 1084              | 870              |
| 111                 | 695           | 617               | 905               | 760              |
| 210                 | 940           | 1157              | 1143              | 900              |
| 211                 | 843           | 1105              | 1061              | 879              |
| 221                 | 829           | 1084              | 1043              | 820              |
| 310                 | 925           | 1161              | 1125              | 890              |
| 311                 | 877           | 1129              | 1094              | 860              |
| 320                 | 931           | 1165              | 1141              | 890              |
| 321                 | 880           | 1142              | 1111              | 860              |
| 322                 | 809           | 1057              | 1015              | 770              |
| 331                 | 857           | 1117              | 1077              | 850              |
| 332                 | 801           | 1035              | 1002              | 790              |

All DFT values are taken from the MPDB.

**Planar Defects Energies.**

Similar to the terminated surface energy, we validated our DNP on various planar defects and compared our results to those listed in the MPDB.

**Table S6.** Ag Planar Defects surfaces energies in mJ/m<sup>2</sup>.

| Sigma | Defect Plane     | Rotation Plane | Rotation | $\gamma_s$ Ag |                   |                   |     |
|-------|------------------|----------------|----------|---------------|-------------------|-------------------|-----|
|       |                  |                |          | DNP           | EAM1 <sup>7</sup> | EAM2 <sup>8</sup> | DFT |
| 3     | $\overline{112}$ | 110            | 180.0    | 586           | 615               | 553               | 540 |
| 3     | $\overline{110}$ | 111            | 109.47   | 362           | 436               | 408               | 430 |
| 3     | 111              | 111            | 60.00    | 8.12          | -19               | 24                | 70  |
| 5     | $\overline{013}$ | 100            | 53.13    | 491           | 646               | 595               | 550 |
| 5     | $\overline{021}$ | 100            | 36.87    | 531           | 711               | 671               | 590 |
| 5     | 100              | 100            | 36.87    | 407           | 497               | 458               | 420 |
| 7     | 111              | 111            | 36.87    | 183           | 222               | 205               | 210 |
| 7     | $\overline{321}$ | 111            | 38.21    | 515           | 675               | 624               | 540 |
| 9     | 110              | 110            | 38.94    | 458           | 609               | 580               | 510 |
| 9     | $\overline{221}$ | 110            | 38.94    | 677           | 892               | 814               | 710 |

All DFT calculations from this work.

**Table S7.** Au Planar Defects surfaces energies in mJ/m<sup>2</sup>.

| Sigma | Defect Plane     | Rotation Plane | Rotation | $\gamma_s$ Au |                   |                   |     |
|-------|------------------|----------------|----------|---------------|-------------------|-------------------|-----|
|       |                  |                |          | DNP           | EAM1 <sup>7</sup> | EAM2 <sup>8</sup> | DFT |
| 3     | $\overline{112}$ | 110            | 180.0    | 603           | 629               | 543               | 460 |
| 3     | $\overline{110}$ | 111            | 109.47   | 254           | 437               | 409               | 340 |
| 3     | 111              | 111            | 60.00    | 74            | 35                | 35                | 30  |
| 5     | $\overline{013}$ | 100            | 53.13    | 499           | 756               | 620               | 450 |
| 5     | $\overline{021}$ | 100            | 36.87    | 497           | 775               | 663               | 520 |
| 5     | 100              | 100            | 36.87    | 351           | 502               | 456               | 320 |
| 7     | 111              | 111            | 36.87    | 404           | 711               | 622               | 440 |
| 7     | $\overline{321}$ | 111            | 38.21    | 181           | 300               | 206               | 170 |
| 9     | 110              | 110            | 38.94    | 412           | 635               | 571               | 390 |
| 9     | $\overline{221}$ | 110            | 38.94    | 613           | 979               | 818               | 610 |

All DFT calculations from this work.

### Comparison of Potentials.

Comparing all properties of bulk Ag reveals similar accuracy compared to the DFT calculations for all three models DNP, EAM1, and EAM2, with absolute %E<sub>DIF</sub> of 14.5 and 30.9 and 33.5, respectively. Further, the average total difference of DFT values from the selected experimental values is 29.9, which indicates that DFT can describe experimental values relatively well. For the Au validation properties, the two EAM atomistic force-fields reproduce the DFT with a similar accuracy of 31.2 and 31.9, nearly a factor of 2 larger than that of the DNP model (13.6). The difference between the experimental and DFT values is more prominent than what we observed for the Ag data with a value of 43.9, which is likely to influence heavy atom effects of Au such as spin-orbit coupling and relativistic effects.

### Comparison of Core-Shell NP Growth via DNP and DFT.

We simulated Au growth on a Ag NP using DFT and compared it with our DNP results to find good agreement (**Figure S2**). As DFT calculations have a much greater computation cost, we limited our DFT comparisons to time points 0, 50, 100, and 200 ns. We observe less than 2.2 % error or 0.8 eV (50 ns time point) difference between the DNP and DFT Au@Ag NP growth for all time frames compared.

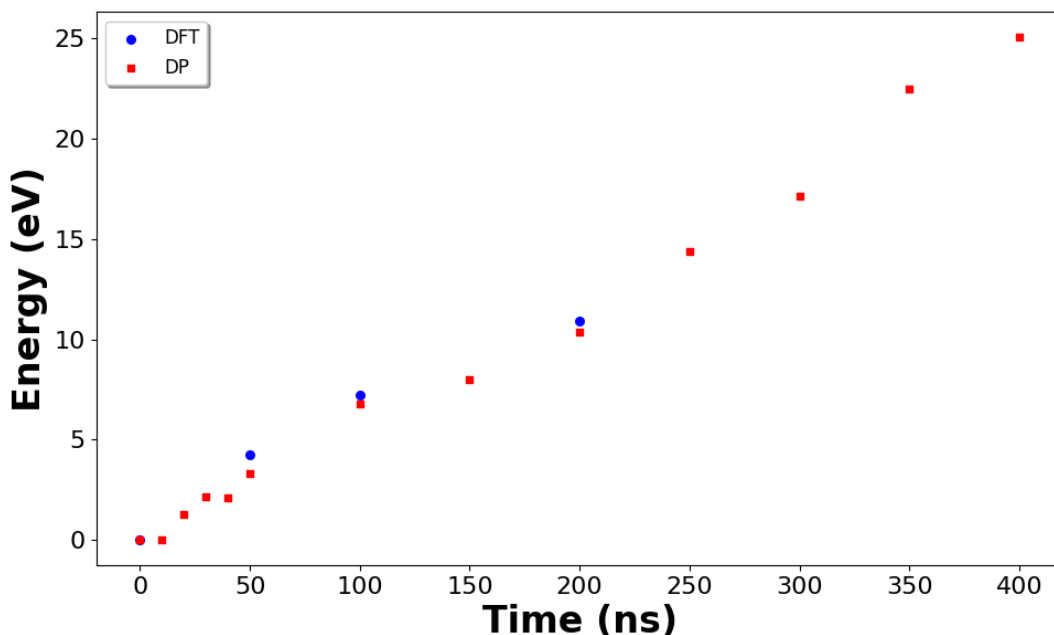

**Figure S2.** Comparison of DNP and DFT showing the difference in energies during Au@Ag NP growth various timepoints.

## References.

1. Hill, R., The Elastic Behaviour of a Crystalline Aggregate. *Proc. Phys. Soc., A* **1952**, 65, 349-354.
2. Reuss, A., Berechnung Der Fließgrenze Von Mischkristallen Auf Grund Der Plastizitätsbedingung Für Einkristalle. *Z. Angew. Math. Mech.* **1929**, 9, 49-58.
3. Voigt, W., *Lehrbuch Der Kristallphysik*; Teubner Leipzig, 1928; Vol. 962.
4. Andolina, C. M.; Williamson, P.; Saidi, W. A., Optimization and Validation of a Deep Learning CuZr Atomistic Potential: Robust Applications for Crystalline and Amorphous Phases with near-Dft Accuracy. *J Chem. Phys.* **2020**, 152, 154701.
5. Henkelman, G.; Uberuaga, B. P.; Jónsson, H., A Climbing Image Nudged Elastic Band Method for Finding Saddle Points and Minimum Energy Paths. *J. Chem. Phys.* **2000**, 113, 9901-9904.
6. Plimpton, S., Fast Parallel Algorithms for Short-Range Molecular Dynamics. *J. Comput. Phys.* **1995**, 117, 1-19.
7. Foiles, S. M.; Baskes, M. I.; Daw, M. S., Embedded-Atom-Method Functions for the Fcc Metals Cu, Ag, Au, Ni, Pd, Pt, and Their Alloys. *Phys. Rev. B* **1986**, 33, 7983-7991.
8. Zhou, X. W.; Johnson, R. A.; Wadley, H. N. G., Misfit-Energy-Increasing Dislocations in Vapor-Deposited CoFe/NiFe Multilayers. *Phys. Rev. B* **2004**, 69, 144113.
9. Jain, A., et al., Commentary: The Materials Project: A Materials Genome Approach to Accelerating Materials Innovation. *APL Mater.* **2013**, 1, 011002.
